# Supplementary material for: Comprehensive Analysis to Identify LINC00511–hsa-miR-625-5p–SEMA6A Pathway Fuels Progression of Skin Cutaneous Melanoma
Source: Hindawi journal article supplement (doi:10.1155/2023/6422941), 2023-07-03
Supplement: f1 [file 6422941.f1.pdf]

| gene_name | gene_id         | gene_biotype   | cor_pearson | p_pearson | cor_spearman |
|-----------|-----------------|----------------|-------------|-----------|--------------|
| DIPK1B    | ENSG00000165716 | protein_coding | 0.575945255 | 1.05E-42  | 0.556153744  |
| CAPN3     | ENSG00000092529 | protein_coding | 0.503159679 | 2.11E-31  | 0.472579217  |
| GCNT2     | ENSG00000111846 | protein_coding | 0.500138593 | 5.45E-31  | 0.480528506  |
| TUBB4A    | ENSG00000104833 | protein_coding | 0.518146537 | 1.64E-33  | 0.459933432  |
| PLXNC1    | ENSG00000136040 | protein_coding | 0.508940919 | 3.33E-32  | 0.501185041  |
| RASSF3    | ENSG00000153179 | protein_coding | 0.54108361  | 6.02E-37  | 0.545387049  |
| GREB1     | ENSG00000196208 | protein_coding | 0.519353134 | 1.10E-33  | 0.477065106  |
| CYP2U1    | ENSG00000155016 | protein_coding | 0.54524625  | 1.34E-37  | 0.526226317  |
| HPS4      | ENSG00000100099 | protein_coding | 0.590220679 | 2.87E-45  | 0.572140474  |
| PPM1H     | ENSG00000111110 | protein_coding | 0.722599311 | 9.61E-77  | 0.713321526  |
| CDK2      | ENSG00000123374 | protein_coding | 0.684660223 | 5.29E-66  | 0.68235159   |
| TBC1D7    | ENSG00000145979 | protein_coding | 0.502077588 | 2.96E-31  | 0.480077435  |
| TRPM1     | ENSG00000134160 | protein_coding | 0.613792209 | 8.63E-50  | 0.615968314  |
| RAB32     | ENSG00000118508 | protein_coding | 0.535295194 | 4.69E-36  | 0.544204525  |
| GMPR      | ENSG00000137198 | protein_coding | 0.527514584 | 6.98E-35  | 0.534886923  |
| HHAT      | ENSG00000054392 | protein_coding | 0.587679579 | 8.40E-45  | 0.593691191  |
| TRIM32    | ENSG00000119401 | protein_coding | 0.503415898 | 1.94E-31  | 0.502792764  |
| TFAP2A    | ENSG00000137203 | protein_coding | 0.67361576  | 3.54E-63  | 0.695482514  |
| MLANA     | ENSG00000120215 | protein_coding | 0.569643006 | 1.30E-41  | 0.586401709  |
| CDH3      | ENSG00000062038 | protein_coding | 0.504872691 | 1.23E-31  | 0.474679922  |
| MITF      | ENSG00000187098 | protein_coding | 0.616413907 | 2.56E-50  | 0.617699207  |
| SLC3A2    | ENSG00000168003 | protein_coding | 0.511718569 | 1.36E-32  | 0.538219321  |
| IGSF3     | ENSG00000143061 | protein_coding | 0.516049887 | 3.29E-33  | 0.514364081  |
| TTYH2     | ENSG00000141540 | protein_coding | 0.579380724 | 2.61E-43  | 0.573728646  |
| DERA      | ENSG00000023697 | protein_coding | 0.542026717 | 4.29E-37  | 0.563002457  |
| OCA2      | ENSG00000104044 | protein_coding | 0.523001415 | 3.24E-34  | 0.502189429  |
| DCT       | ENSG00000080166 | protein_coding | 0.569806812 | 1.22E-41  | 0.53342343   |
| RAB5B     | ENSG00000111540 | protein_coding | 0.506908475 | 6.40E-32  | 0.518546641  |
| DUSP3     | ENSG00000108861 | protein_coding | 0.510589821 | 1.96E-32  | 0.531986747  |
| ABCC2     | ENSG00000023839 | protein_coding | 0.558957547 | 8.17E-40  | 0.564050351  |
| GPR143    | ENSG00000101850 | protein_coding | 0.611181213 | 2.85E-49  | 0.634600956  |
| NR4A3     | ENSG00000119508 | protein_coding | 0.541979145 | 4.36E-37  | 0.535037592  |
| SCARB1    | ENSG00000073060 | protein_coding | 0.538186043 | 1.69E-36  | 0.559984158  |
| FGD1      | ENSG00000102302 | protein_coding | 0.503425198 | 1.94E-31  | 0.493851541  |
| ZNF749    | ENSG00000186230 | protein_coding | 0.536161593 | 3.46E-36  | 0.53685124   |
| PARD6G    | ENSG00000178184 | protein_coding | 0.558426925 | 1.00E-39  | 0.555018048  |
| IRF4      | ENSG00000137265 | protein_coding | 0.554626848 | 4.20E-39  | 0.59185764   |
| MYO10     | ENSG00000145555 | protein_coding | 0.517210103 | 2.24E-33  | 0.510443992  |
| SNCA      | ENSG00000145335 | protein_coding | 0.506662964 | 6.92E-32  | 0.517174581  |
| TBC1D16   | ENSG00000167291 | protein_coding | 0.622628153 | 1.38E-51  | 0.624993956  |
| PMEL      | ENSG00000185664 | protein_coding | 0.652153613 | 5.02E-58  | 0.660957279  |
| TRIM63    | ENSG00000158022 | protein_coding | 0.62257741  | 1.41E-51  | 0.624085745  |
| TSPAN10   | ENSG00000182612 | protein_coding | 0.527580359 | 6.83E-35  | 0.505810477  |
| TIMM50    | ENSG00000105197 | protein_coding | 0.503062571 | 2.17E-31  | 0.524951191  |
| ZNF703    | ENSG00000183779 | protein_coding | 0.544097525 | 2.03E-37  | 0.522065766  |

|         |                 |                |             |          |             |
|---------|-----------------|----------------|-------------|----------|-------------|
| DIPK1C  | ENSG00000187773 | protein_coding | 0.543839853 | 2.23E-37 | 0.551527516 |
| ESRP1   | ENSG00000104413 | protein_coding | 0.543944654 | 2.15E-37 | 0.497016646 |
| ABCB5   | ENSG00000004846 | protein_coding | 0.582362143 | 7.68E-44 | 0.595937336 |
| ITPKB   | ENSG00000143772 | protein_coding | 0.545553778 | 1.20E-37 | 0.543579957 |
| SLC7A5  | ENSG00000103257 | protein_coding | 0.615646143 | 3.66E-50 | 0.63582305  |
| CA14    | ENSG00000118298 | protein_coding | 0.584784867 | 2.82E-44 | 0.566444667 |
| CABLES1 | ENSG00000134508 | protein_coding | 0.635532137 | 2.58E-54 | 0.630751108 |
| CLCN7   | ENSG00000103249 | protein_coding | 0.538693388 | 1.41E-36 | 0.538189819 |

---

p\_spearman

0  
0  
0  
0  
0  
0  
0  
0  
0  
0  
0  
0  
0

3.15E-50

0  
0  
0  
0  
0  
0  
0  
0  
0  
0  
0  
0  
0

2.86E-31

0  
0  
0  
0  
0  
0  
0  
0  
0  
0  
0  
0  
0  
0

6.89E-52

0  
0  
0

1.33E-38

0

2.49E-46

0

0

0

0

0

---
