# Supplementary material for: Comprehensive Analysis to Identify LINC00511–hsa-miR-625-5p–SEMA6A Pathway Fuels Progression of Skin Cutaneous Melanoma
Source: Hindawi journal article supplement (doi:10.1155/2023/6422941), 2023-07-03
Supplement: f2 [file 6422941.f2.pdf]

| lncRNA          |            | Tumor(J) vs Normal(I) (Wilcoxon rank sum test) |             |         |
|-----------------|------------|------------------------------------------------|-------------|---------|
| geneID          | geneName   | J-I                                            | 95%CI       | p-value |
| ENSG00000224259 | LINC01133  | -3.038                                         | -0.138      | < 0.001 |
| ENSG00000272205 | AL451050.2 | -0.485                                         | -0.162      | < 0.001 |
| ENSG00000229989 | MIR181A1HG | 0                                              | 0-0.014     | < 0.001 |
| ENSG00000227630 | LINC01132  | 0.056                                          | 0.043-0.057 | < 0.001 |
| ENSG00000231327 | LINC01816  | 0.549                                          | 0.494-0.605 | < 0.001 |
| ENSG00000236634 | AC016903.1 | ns                                             | ns          | ns      |
| ENSG00000227308 | AC009502.1 | 0                                              | 0-0         | < 0.001 |
| ENSG00000251615 | AC104825.1 | -1.261                                         | -0.19       | < 0.001 |
| ENSG00000259959 | AC107068.1 | -0.585                                         | -0.079      | < 0.001 |
| ENSG00000224843 | LINC00240  | 0.195                                          | 0.127-0.264 | < 0.001 |
| ENSG00000273084 | AC092171.5 | -1.188                                         | -0.14       | < 0.001 |
| ENSG00000273014 | AC018645.2 | ns                                             | ns          | ns      |
| ENSG00000272384 | AC016405.3 | -0.098                                         | -0.052      | < 0.001 |
| ENSG00000249859 | PVT1       | 0.377                                          | 0.248-0.508 | < 0.001 |
| ENSG00000233926 | AL591368.1 | 0                                              | 0-0         | < 0.001 |
| ENSG00000185904 | LINC00839  | 1.31                                           | 1.152-1.461 | < 0.001 |
| ENSG00000251381 | LINC00958  | -1.502                                         | -0.298      | < 0.001 |
| ENSG00000251562 | MALAT1     | -3.424                                         | -0.26       | < 0.001 |
| ENSG00000268836 | Z69706.1   | -0.714                                         | -0.157      | < 0.001 |
| ENSG00000261512 | AC092368.3 | 1.03                                           | 0.957-1.103 | < 0.001 |
| ENSG00000277559 | AC018553.1 | -0.637                                         | -0.115      | < 0.001 |
| ENSG00000261519 | AC010542.4 | -0.041                                         | -0.015      | < 0.001 |
| ENSG00000263126 | AC040162.3 | -0.916                                         | -0.12       | < 0.001 |
| ENSG00000271009 | AC116667.1 | -0.243                                         | -0.059      | < 0.001 |
| ENSG00000227036 | LINC00511  | 1.826                                          | 1.662-1.998 | < 0.001 |
| ENSG00000263731 | AC145207.5 | 0.059                                          | 0-0.121     | 0.062   |
| ENSG00000264247 | LINC00909  | 0.228                                          | 0.154-0.301 | < 0.001 |
| ENSG00000267100 | ILF3-DT    | -0.499                                         | -0.169      | < 0.001 |
| ENSG00000232098 | AC012313.1 | -0.734                                         | -0.142      | < 0.001 |
| ENSG00000229807 | XIST       | -0.472                                         | -0.153      | < 0.001 |
| ENSG00000230590 | FTX        | -0.693                                         | -0.13       | < 0.001 |
| ENSG00000223749 | MIR503HG   | 0.305                                          | 0.174-0.437 | < 0.001 |

| pseudogene      |            | Tumor(J) vs Normal(I) (Wilcoxon rank sum test) |             |         |
|-----------------|------------|------------------------------------------------|-------------|---------|
| geneID          | geneName   | J-I                                            | 95%CI       | p-value |
| ENSG00000225972 | MTND1P23   | -1.111                                         | -0.228      | < 0.001 |
| ENSG00000229344 | MTCO2P12   | 0.775                                          | 0.695-0.854 | < 0.001 |
| ENSG00000248527 | MTATP6P1   | -0.811                                         | -0.183      | < 0.001 |
| ENSG00000238145 | AL731892.1 | 0                                              | -0.043      | < 0.001 |
| ENSG00000225154 | AL450996.1 | 0                                              | 0-0         | < 0.001 |
| ENSG00000235449 | AC098934.2 | -0.985                                         | -0.453      | < 0.001 |
| ENSG00000226945 | AC098935.1 | 0.137                                          | 0.115-0.138 | < 0.001 |

|                 |            |        |             |         |
|-----------------|------------|--------|-------------|---------|
| ENSG00000268412 | TRMT112P6  | -0.025 | -0.098      | < 0.001 |
| ENSG00000231362 | AC069271.1 | 0      | 0-0         | 0.239   |
| ENSG00000214820 | MPRIIP1    | 0.092  | 0.064-0.119 | < 0.001 |
| ENSG00000242849 | ALDOAP1    | 0      | 0-0         | 0.001   |
| ENSG00000214552 | COPS8P2    | 0      | -0.04       | < 0.001 |
| ENSG00000241506 | PSMC1P1    | 0.957  | 0.895-1.019 | < 0.001 |
| ENSG00000241627 | UBQLN4P1   | 0.027  | 0.013-0.047 | < 0.001 |
| ENSG00000249506 | ZEB2P1     | 0      | 0-0         | < 0.001 |
| ENSG00000249245 | NCOA4P3    | 0      | 0-0         | 0.003   |
| ENSG00000249286 | AMD1P3     | 0.075  | 0.057-0.084 | < 0.001 |
| ENSG00000270307 | MTATP6P2   | ns     | ns          | ns      |
| ENSG00000220748 | AL032822.1 | 0      | 0-0         | 0.953   |
| ENSG00000228285 | LYPLA2P1   | 0.098  | 0.076-0.111 | < 0.001 |
| ENSG00000220483 | SLC25A51P1 | 0      | 0-0         | 0.683   |
| ENSG00000262095 | MTATP6P25  | ns     | ns          | ns      |
| ENSG00000196204 | RNF216P1   | 0.555  | 0.493-0.617 | < 0.001 |
| ENSG00000224280 | AC005014.1 | 0      | 0-0         | 0.001   |
| ENSG00000233225 | SSBP3P1    | 0.014  | -0.067      | 0.396   |
| ENSG00000236692 | AC099654.3 | 0      | 0-0         | 0.629   |
| ENSG00000224415 | AC007683.1 | 0.013  | 0-0.039     | 0.132   |
| ENSG00000213590 | AL807752.1 | 0      | -0.014      | 0.364   |
| ENSG00000214297 | ALDOAP2    | 0      | 0-0         | 0.002   |
| ENSG00000254502 | AP003097.1 | 0      | 0-0         | < 0.001 |
| ENSG00000237493 | AC034102.1 | -0.016 | -0.115      | 0.594   |
| ENSG00000215571 | GRK6P1     | 0.028  | 0.014-0.029 | < 0.001 |
| ENSG00000230022 | FNTAP2     | 0      | 0-0         | < 0.001 |
| ENSG00000231417 | IRX1P1     | 0      | 0-0         | 0.261   |
| ENSG00000230793 | SMARCE1P5  | 0      | 0-0         | 0.763   |
| ENSG00000232380 | ZDHHC20P4  | 0.057  | 0.043-0.07  | < 0.001 |
| ENSG00000227105 | PARP1P1    | 0      | 0-0         | 0.031   |
| ENSG00000256385 | UBE2NP1    | 0      | 0-0         | < 0.001 |
| ENSG00000197358 | BNIP3P1    | -0.078 | -0.053      | < 0.001 |
| ENSG00000259045 | MTCO1P2    | 0      | 0-0         | < 0.001 |
| ENSG00000260174 | AC111152.3 | 0.057  | 0.043-0.057 | < 0.001 |
| ENSG00000258611 | YBX2P2     | -0.039 | -0.057      | < 0.001 |
| ENSG00000266994 | AC020663.1 | 0      | 0-0         | 0.04    |
| ENSG00000249176 | AC027801.3 | -0.057 | -0.098      | < 0.001 |
| ENSG00000267264 | AC006504.3 | 0.042  | 0-0.076     | 0.012   |
| ENSG00000242100 | RPL9P32    | 0.098  | 0.084-0.122 | < 0.001 |
| ENSG00000187534 | PRR13P5    | 0.29   | 0.233-0.345 | < 0.001 |
| ENSG00000268101 | CYP2G2P    | 0      | 0-0         | < 0.001 |
| ENSG00000088340 | FER1L4     | -0.831 | -0.187      | < 0.001 |
| ENSG00000230870 | FBXW11P1   | -0.094 | -0.029      | < 0.001 |
| ENSG00000274602 | PI4KAP1    | -1.269 | -0.232      | < 0.001 |
| ENSG00000183506 | PI4KAP2    | -0.947 | -0.156      | < 0.001 |
| ENSG00000217835 | AL034397.1 | 0      | 0-0         | 0.966   |
